25

26 **ABSTRACT**

27       Recently, highly transmissible SARS-CoV-2 variants B.1.617.1 (Kappa), B.1.617.2  
28 (Delta) and B.1.618 were identified in India with mutations within the spike proteins. The  
29 spike protein of Kappa contains four mutations E154K, L452R, E484Q and P681R, and  
30 Delta contains L452R, T478K and P681R, while B.1.618 spike harbors mutations  
31  $\Delta$ 145-146 and E484K. However, it remains unknown whether these variants have altered  
32 in their entry efficiency, host tropism, and sensitivity to neutralizing antibodies as well as  
33 entry inhibitors. In this study, we found that Kappa, Delta or B.1.618 spike uses human  
34 ACE2 with no or slightly increased efficiency, while gains a significantly increased binding  
35 affinity with mouse, marmoset and koala ACE2 orthologs, which exhibits limited binding  
36 with WT spike. Furthermore, the P618R mutation leads to enhanced spike cleavage,  
37 which could facilitate viral entry. In addition, Kappa, Delta and B.1.618 exhibits a reduced  
38 sensitivity to neutralization by convalescent sera owing to the mutation of E484Q, T478K,  
39  $\Delta$ 145-146 or E484K, but remains sensitive to entry inhibitors-ACE2-Ig decoy receptor.  
40 Collectively, our study revealed that enhanced human and mouse ACE2 receptor  
41 engagement, increased spike cleavage and reduced sensitivity to neutralization  
42 antibodies of Kappa, Delta and B.1.618 may contribute to the rapid spread of these  
43 variants and expanded host range. Furthermore, our result also highlighted that ACE2-Ig  
44 could be developed as broad-spectrum antiviral strategy against SARS-CoV-2 variants.

45

46 **Key words:** COVID-19; SARS-CoV-2; Delta variant; Kappa variant; B.1.618; host range;  
47 ACE2 decoy receptor.

48

## 49 INTRODUCTION

50 Since its emergence in late 2019, the severe acute respiratory syndrome coronavirus  
51 2 (SARS-CoV-2) that causes the ongoing COVID-19 pandemic has evolved into several  
52 new viral variants of concern (VOC) and variants of interest (VOI)<sup>1-4</sup>. SARS-CoV-2 enters  
53 host cells by binding angiotensin-converting enzyme 2 (ACE2) in a species-dependent  
54 manner<sup>2,5,6</sup>. For example, murine, New World monkeys and koala ACE2 does not  
55 efficiently bind the SARS-CoV-2 spike protein, hindering viral entry into those species<sup>7</sup>. In  
56 addition, the spike is the target for vaccine and therapeutic antibodies<sup>8,9</sup>, and mutations in  
57 spike may potentially alter SARS-CoV-2 transmission, host tropism, pathogenicity as well  
58 as sensitivity to vaccine-elicited antibodies<sup>10-12</sup>. For example, D614G mutation, identified  
59 at the earlier stage of the pandemic, promotes spike binding to ACE2, leading to  
60 enhanced virus transmission<sup>13,14</sup>. Subsequently, the N501Y mutation found in the B.1.1.7,  
61 B.1.351 and B.1.1.28.1 spike has increased the binding affinity between the  
62 receptor-binding domain (RBD) and ACE2, increasing viral fitness and infectivity<sup>1,15,16</sup>; In  
63 addition, spike with the N501Y mutation has gained the ability to utilize mouse ACE2 as  
64 the receptor to infect mouse, expanding its host range<sup>12</sup>. In addition, K417N and E484K  
65 found in the B.1.351 variant contribute to evasion of neutralization by multiple monoclonal  
66 antibodies<sup>17-19</sup>. Thus, as the COVID-19 pandemic continues, it is critical to closely monitor  
67 the emergence of new variants, as well as their impact on viral transmission,  
68 pathogenesis, and vaccine and therapeutic efficacies.

69 Recently, the number of COVID-19 cases and deaths in India has risen steeply and  
70 the increased spread is associated with newly identified SARS-CoV-2 variants B.1.617  
71 and B.1.618 with mutated spike proteins<sup>20,21</sup>. B.1.617.1 (Kappa), which carries E154K in  
72 the N-terminal domain (NTD) of spike, L452R and E484Q mutations in the RBD of spike,  
73 and P681R in proximity to furin cleavage site, has been designated as VOI by the World  
74 Health Organization (WHO) (<https://www.who.int>). B.1.617.2 (Delta) that carries L452R  
75 and T478K mutations in the RBD of spike, and P681R, has been designated as VOC  
76 (<https://www.who.int>). B.1.618 harbors  $\Delta$ 145-146 (deletion of 145<sup>th</sup> and 146<sup>th</sup> residues)

77 and E484K mutation in the NTD and RBD, respectively. Indeed, some of the mutations in  
78 the Kappa, Delta and B.1.618 have been found in other variants separately. For example,  
79 the L452R mutation has been spotted in the B.1.427 and B.1.429 variants with enhanced  
80 transmissibility and reduced sensitivity to vaccine-elicited Abs<sup>22,23</sup>. T478K has been seen  
81 in Mexican variant B.1.1.519<sup>24</sup>. Also, the E484Q mutation is similar to the E484K found in  
82 the B.1.351, which exhibited reduce neutralization by convalescent sera or monoclonal  
83 antibodies<sup>17,25-27</sup>. For Kappa and Delta variants, this is the first time that L452R and  
84 E484Q (Kappa)/T478K (Delta) mutations are found to coexist together, and P681R is  
85 firstly emerged; for B.1.618, the combination of  $\Delta$ 145-146 in the NTD domain and E484K is  
86 firstly observed.

87 Here, we characterized the spike proteins of Kappa, Delta and B.1.618 on their ability  
88 to utilize different ACE2 orthologs for cell entry, and evaluated their sensitivity to  
89 convalescent sera and soluble ACE2-Ig decoy receptor.

90

91

## 92 **RESULTS**

### 93 **Characterization of cell entry driven by spike proteins of Kappa, Delta and B.1.618.**

94 The rapid spread of the new emerging variants could be caused by the increased  
95 ability to enter the cell, since the variants harbor mutations in the spike proteins (**Fig.1A**).  
96 To examine the biological impact of these mutations on cell entry, we produced  
97 pseudotyped virus particles containing a firefly luciferase reporter gene and expressing on  
98 their surface with the spike proteins of WT (D614G), Kappa, Delta and B.1.618 variants.  
99 HeLa cells expressing human ACE2 (HeLa-human ACE2) were then inoculated with these  
100 pseudoparticles and at 48h post-inoculation, the cells were lysed and the luciferase  
101 activity was monitored as a measure of virus entry (**Fig. 1B**). Compared to WT spike,  
102 Delta and B.1.618 spike proteins gained an increased ability to mediate viral entry into  
103 HeLa-human ACE2 cells, which are contributed by T478K (Delta), P681R (Delta),  
104  $\Delta$ 145-146 (B.1.618) and E484K (B.1.618). Spike protein of Kappa exhibited comparable  
105 ability to mediate viral entry, even E484Q or P681R mutation in its spike could significantly  
106 promote viral entry individually.

107 SARS-CoV-2 has a broad host range, and its spike could utilize a diverse range of  
108 ACE2 orthologs for cell entry<sup>7,28</sup>. However, we and others previously found that  
109 SARS-CoV-2 spike has a limited binding affinity with mouse, New World monkey or koala  
110 ACE2 and does not efficiently mediate virus entry into these species<sup>7,28,29</sup>. We thus sought  
111 to evaluate the abilities of variants' spike proteins in utilization of these ACE2 proteins for  
112 cell entry. To this end, we produced virus pseudotyped with SARS-CoV-2 variant spike  
113 proteins with single or combination of mutations. The HeLa cells expressing mouse,  
114 marmoset (New World monkey), or koala ACE2 orthologs were then inoculated with  
115 pseudoparticles and luciferase activity was determined at 48h post-inoculation (**Fig. 1B**).  
116 Our results showed that spike proteins from Kappa, Delta and B.1.618 could significantly  
117 enhanced cell entry into HeLa-mouse ACE2 cells, as results of T478K (B.1.618), E484Q  
118 (Kappa) and E484K (Delta). Beside HeLa-mouse ACE2, Delta also exhibited significantly  
119 enhanced cell entry into HeLa-marmoset and HeLa-koala cells, which are contributed by

120 L452R and T478K mutations. In contrast, Kappa did not increased cell entry into  
121 HeLa-marmoset or HeLa-koala cells, and B.1.618 only showed enhanced entry into  
122 HeLa-koala cells, which is attributable to E484K.

123 Taken together, our results demonstrated that the spike protein of Kappa, Delta or  
124 B.1.618 with distinct mutations have altered their ability in utilizing ACE2 orthologs for cell  
125 entry. Delta and B.1.618 variants gained an enhanced ability to use human ACE2 receptor  
126 for cell entry. Remarkably, Delta variant gained the function to utilize mouse, New World  
127 monkey or koala ACE2 orthologs, which cannot be engaged with WT virus, for cell entry,  
128 with potential to extend its host range to these species.

129

130 **The spike protein of Kappa, Delta and B.1.618 gained an increased binding affinity**  
131 **with human ACE2 and other othologs.**

132 As the Kappa, Delta and B.1.618 spike mediate increased cell entry efficiency, which  
133 could be caused by the increased binding affinity for ACE2. We employed a cell-based  
134 assay that uses flow cytometry to assess the binding of RBD of spike protein to human  
135 ACE2 (**Fig. S1A**). We cloned the cDNA of human ACE2 into a bicistronic lentiviral vector  
136 (pLVX-IRES-zsGreen1) that expresses the fluorescent protein zsGreen1 via an IRES  
137 element and can be used to monitor transduction efficiency. Next, WT or variants derived  
138 RBD-His (a purified fusion protein consisting of the RBD and a polyhistidine tag at the  
139 C-terminus) was incubated with HeLa cells transduced with the human ACE2. Binding of  
140 RBD-His to ACE2 was then quantified by flow cytometry (**Fig. S1 and Fig. 2A**). As shown,  
141 the binding efficiencies of the RBDs of Kappa (L452R+E484Q) (98.88%), Delta  
142 (L452R+T478K) (99.04%), B.1.618 (E484K) (98.76%), L452R (98.90%), and E484Q  
143 (98.48%) were higher than WT (89.6%), suggesting the RBD of variants bind human  
144 ACE2 with a higher affinity (**Fig. 2A**).

145 To test whether the spike proteins of the variants have altered in binding with mouse,  
146 marmoset and koala ACE2 orthologs, we incubated the recombinant RBD-His of variants'  
147 spike with HeLa cells expressing mouse, marmoset or koala ACE2, and the binding of

148 RBD-His to ACE2 ortholog was quantified by flow cytometry (**Fig. S1 and Fig. 2A**). The  
149 WT RBD-His cannot bind with mouse, marmoset or koala ACE2 as previously  
150 reported<sup>2,7,29</sup>; In contrast, RBD-His of Kappa, Delta, and B.1.618 bind with mouse,  
151 marmoset and koala ACE2 with a varying affinity, suggesting that these variants have  
152 evolved to gain the function for binding with non-human ACE2 orthologs.

153 As Delta variant has now become the most dominant strain of the coronavirus  
154 circulating globally, we expressed and purified recombinant human and ACE2, as well as  
155 WT and Delta variant's RBDs, and directly assayed the protein binding in vitro by surface  
156 plasmon resonance (SPR) analysis (**Fig. 2B**). The dissociation constant (Kd) for human  
157 ACE2 binding the WT RBD was 5.50 nM while that of Delta RBD was 2.67 nM, about  
158 2-fold higher than WT RBD. As expected, the WT RBD cannot bind with mouse ACE2;  
159 strikingly, the Delta RBD could bind mouse ACE2 with Kd of 65.93 nM.

160 Taken together, our results demonstrated that the spike proteins of Kappa, Delta and  
161 B.1.618 have evolved to enhance their binding affinity with human ACE2. Remarkably, the  
162 spike proteins of these variants also gain the function to bind with mouse, marmoset and  
163 koala ACE2, with potential to extend SARS-CoV-2 host range.

164

#### 165 **P681R mutation in Kappa and Delta variants with enhanced spike protein cleavage.**

166 SARS-CoV-2 spike harbors a multibasic furin cleavage site (residues 681–686;  
167 PRRARS) at the S1/S2 junction, and the proteolytic processing of the spike by furin and  
168 TMPRSS2 proteases is important for SARS-CoV-2 infection<sup>5,30-33</sup>. Kappa and Delta  
169 variants contain a P681R substitution (**Fig. 1A and 2C**), potentially optimizing the furin  
170 cleavage site, which prompted us to examine the effect of the P681R substitution on furin  
171 cleavage. To do this, we produced MLV viral particles pseudotyped with WT spike, Kappa  
172 spike, or P681R spike. Viruses in the cell culture supernatants were harvested and  
173 concentrated for immunoblot analysis of spike protein cleavage by polyclonal antibody  
174 against spike protein (**Fig. 2C**). Interestingly, our data showed significantly increased  
175 cleavage of the full length spike protein (S0) into the S1 and S2 fragments in Kappa spike

176 and P681R spike pseudotyped viruses compared with WT spike., The cleaved S1/S0 ratio  
177 was 2.1- (Kappa) or 3.0- (P681R) folds higher than WT, and the cleaved S2/S0 was 2.4-  
178 (Kappa) or 1.8 (P681R)- folds higher than WT. These results suggest that P618R  
179 substitution in the Kappa and Delta variants could enhance spike cleavage, and  
180 subsequently facilitate viral entry and transmission.

181

182 **Kappa, Delta and B.1.618 variants exhibited resistance to neutralization by**  
183 **convalescent serum, while remained sensitive to ACE2 based decoy receptor**  
184 **antiviral countermeasure**

185 SARS-CoV-2 infection-elicited neutralizing antibodies target the spike protein, which  
186 is critical for protection from re-infection<sup>34,35</sup>. We hypothesized that mutations in the spike  
187 protein of the Kappa, Delta and B.1.618 variants might contribute to the evasion of  
188 neutralizing antibodies. Therefore, we sought to determine the sensitivity of these variants  
189 to neutralization by convalescent serum. We chose plasma from COVID-19 patients  
190 (**Table S1, S2 and S3**) and measured the neutralization activity of convalescent plasma  
191 against virions pseudotyped with single or combined mutations from Kappa, Delta and  
192 B.1.618 variants (**Fig. 4A, B and C**). To this end, we preincubated the serial-diluted  
193 convalescent sera with virion pseudotyped with spike proteins as describe above, and  
194 subsequently tested on HeLa-human ACE2 cells. Cell entry of pseudotyped virion in  
195 presence of convalescent plasma with varying concentrations was assessed 48 hours  
196 later by measurement of luciferase activities. The results showed that Kappa, Delta and  
197 B.1.618 exhibited 1.8-, 3.0- and 3.3-folds resistance to neutralization by convalescent  
198 sera, respectively, which is conferred by E484Q, L452R+E484Q, T478K,  $\Delta$ 145-146 and  
199 E484K (**Fig. 4A, B and C**).

200 Previous studies have shown that ACE2-Ig (ACE2 fused with Fc recombinant protein)  
201 exhibited a potent antiviral effect against SARS-CoV-2 infection<sup>28,36</sup>. As the spike proteins  
202 of Kappa, Delta and B.1.618 exhibited enhanced ACE2 binding affinity, it could be more  
203 sensitive to the inhibition by ACE2 decoy receptor. To this end, we used an SARS-CoV-2



204 transcription and replication competent virus-like particle (trVLP) cell culture system,  
205 which recapitulates the entire viral life cycle in Caco-2-N cells<sup>37</sup>, to engineer the desired  
206 mutations in the spike proteins of Kappa, Delta and B.1.618 variants into an SARS-CoV-2  
207 isolate Wuhan-Hu-1 with D614G (WT) backbone, and examined the sensitivity of trVLP of  
208 Kappa, Delta and B.1.618 to inhibition of ACE2-Ig. Specifically, we inoculated the  
209 Caco-2-N cells with WT, Kappa, Delta or B.1.618 trVLP (moi=0.1) in the presence of  
210 ACE2-Ig at varying concentrations. After 48h, the cells were collected and GFP  
211 expression was quantified as the proxy of virus infection by flow cytometry. ACE2-Ig could  
212 potently inhibit WT, Kappa, Delta and B.1.618 trVLP infection with IC<sub>50</sub> of 21.05 ng/ml,  
213 9.90 ng/ml, 15.80ng/ml and 15.77 ng/ml, indicating that the Kappa, Delta and B.1.618 are  
214 still sensitive to inhibition by ACE2-Ig (**Fig. 4A, B and C**). In summary, the Kappa, Delta  
215 and B.1.618 exhibited a reduced sensitivity to neutralization by convalescent serum, while  
216 remained sensitive to ACE2 decoy receptor antiviral countermeasure.

217

218

## 219 **DISCUSSION**

220 The emergence of SARS-CoV-2 variants imposes challenges to control of the  
221 COVID-19 pandemic<sup>1,38,39</sup>. The recent surge in COVID-19 cases and mortalities in India is  
222 associated with new SARS-CoV-2 variants Kappa, Delta and B.1.618 with mutated spike  
223 proteins<sup>21</sup>. In this manuscript, we characterized the biological properties of these new  
224 variants, including the efficiency of entry into cells, the binding affinities with human ACE2,  
225 as well as other orthologs and the sensitivity to neutralization by convalescent plasma and  
226 recombinant ACE2-Ig decoy receptor (**Fig. 5**).

227 We found that the Kappa variant has not increased in cell entry of HeLa-human ACE2  
228 cells and slightly increased in cell entry of HeLa-mouse ACE2 cells. Delta variant has  
229 significantly increased in cell entry of HeLa-human ACE2, HeLa-mouse ACE2,  
230 HeLa-marmoset ACE2 and HeLa-koala ACE2 cells; consistently, Delta RBD binds human  
231 ACE2 with a higher affinity. Remarkably, Delta RBD gained the ability to bind with mouse,  
232 marmoset and koala ACE2 orthologs, which exhibited limited binding affinity with WT RBD.  
233 B.1.618 variant has dramatically increased in cell entry of HeLa-human ACE2 cells,  
234 HeLa-mouse ACE2, and HeLa-koala ACE2 cells, but not HeLa-marmoset ACE2 cells.  
235 Additionally, P681R mutation in the spike proteins of Kappa and Delta variants enhanced  
236 the spike processing. Recent studies have found that the Delta bearing P681R infection  
237 could form large size syncytia compared to other variants<sup>40</sup>, further indicating that the  
238 P681R mutation in the furin cleavage site could enhance viral fusogenicity. As furin  
239 cleavage site is critical for viral pathogenesis and transmission<sup>32,41</sup>, the Kappa and Delta  
240 bearing the optimized furin cleavage site have potentially evolved increased pathogenicity  
241 and transmissibility, which is urgently needed to be investigated. Remarkably, our results  
242 suggest that the Kappa, Delta and B.1.618 variants have extended their ACE2 orthologs  
243 usages into mouse, koala and New World monkeys (**Fig. 1B**), raising a potential risk of  
244 mice or other rodents becoming the reservoirs for SARS-CoV-2, and the virus could  
245 potentially spillback to humans as the mice are living closed to human (**Fig. 5**). Thus, we  
246 recommend that the host range should be closely monitored along the continued evolution

247 of SARS-CoV-2 to prevent future zoonosis-associated outbreaks.

248 SARS-CoV-2 variants Kappa, Delta and B.1.618 exhibited reduced sensitivity to  
249 neutralization by polyclonal antibodies in the serum from individuals previously infected  
250 with SARS-CoV-2 (**Fig. 3A, B and C**). Our analysis suggest that the immune escape is  
251 mainly conferred by the E484Q, T484K,  $\Delta$ 145-146 and E484K mutations, these new  
252 variants must be further surveyed to avoid fast-spreading and raises alerts if it was  
253 considered to be soon variants contributing to accelerate the spread of the virus in human  
254 populations. Thus, our findings highlight the critical need for broad-spectrum neutralizing  
255 antibodies insensitive to substitutions arising in VOCs or VOIs. In addition, we further  
256 demonstrated that the ACE2 decoy receptor-based antiviral strategy was represented as  
257 an alternative countermeasures against the VOCs, as the VOCs, Kappa and B.1.618  
258 exhibited increased binding with human ACE2<sup>1,39</sup>. Our results showed that recombinant  
259 ACE2-Ig protein could inhibit Kappa, Delta and B.1.618 infection with efficacy of  
260 comparable or better than that of WT (**Fig. 4A-D and Fig. 5**), which is consistent with the  
261 results that Kappa, Delta and B.1.618 spike proteins exhibited increased binding affinity  
262 with human ACE2 (**Fig. 2B**). In addition, it has been demonstrated that human ACE2  
263 peptidase activity and viral receptor activity could be uncoupled<sup>42,43</sup>, thus it is possible that  
264 the enzymatic inactivated ACE2 was developed as the antivirals in clinics to avoid the  
265 potential ACE2 side effected mediated by its enzymatic activity.

266 New variants of concern will continue to emerge as the COVID-19 pandemic persists,  
267 which highlight the importance of genomic surveillance for the early identification of future  
268 variants. The potential of variants to escape naturally induced and vaccine elicited  
269 immunity makes the development of next-generation vaccines that elicit broadly  
270 neutralizing activity against current and future variants a priority<sup>22,25,40</sup>. In addition, the  
271 suppression of viral replication with both public health measures and the equitable  
272 distribution of vaccines, increasing the proportion of the population immunized with  
273 current safe and effective authorized vaccines, is critical to minimize the risk of  
274 emergence of new variants. Also the development of broad-spectrum antivirals, especially

275 against diverse SARS-CoV-2 variants, is therefore of continued significance.

276

277

278 **Acknowledgements**

279         We thank Dr. Jenna M. Gaska for suggestions and revision of the manuscript. We are  
280 grateful to other members of the Ding lab for critical discussions and comments on the  
281 manuscript.

282         This work was supported by the National Natural Science Foundation of China  
283 (32070153 to QD), Beijing Municipal Natural Science Foundation (M21001 to QD), and  
284 Start-up Foundation of Tsinghua University (53332101319).

285

286

287

## 288 **Materials and methods**

289 **Cell culture.** HEK293T (American Tissue Culture Collection, ATCC, Manassas, VA,  
290 CRL-3216), Vero E6 (Cell Bank of the Chinese Academy of Sciences, Shanghai, China)  
291 and A549 (ATCC) cells were maintained in Dulbecco's modified Eagle medium (DMEM)  
292 (Gibco, NY, USA) supplemented with 10% (vol/vol) fetal bovine serum (FBS), 10mM  
293 HEPES, 1mM sodium pyruvate, 1×non-essential amino acids, and 50 IU/ml  
294 penicillin/streptomycin in a humidified 5% (vol/vol) CO<sub>2</sub> incubator at 37°C. Cells were  
295 tested routinely and found to be free of mycoplasma contamination.

296 **Plasmids.** The cDNAs encoding the ACE2 orthologs were synthesized by GenScript and  
297 cloned into the pLVX-IRES-zsGreen1 vector (Catalog No. 632187, Clontech Laboratories,  
298 Inc) with a C-terminal FLAG tag. ACE2 mutants were generated by Quikchange  
299 (Stratagene) site-directed mutagenesis. All constructs were verified by Sanger  
300 sequencing.

301 **Lentivirus production.** Vesicular stomatitis virus G protein (VSV-G) pseudotyped  
302 lentiviruses expressing ACE2 orthologs tagged with FLAG at the C-terminus were  
303 produced by transient co-transfection of the third-generation packaging plasmids pMD2G  
304 (Addgene #12259) and psPAX2 (Addgene #12260) and the transfer vector with VigoFect  
305 DNA transfection reagent (Vigorous) into HEK293T cells. The medium was changed 12 h  
306 post transfection. Supernatants were collected at 24 and 48h after transfection, pooled,  
307 passed through a 0.45- $\mu$ m filter, and frozen at -80°C.

308 **Surface ACE2 binding with RBD-His assay.** HeLa cells were transduced with  
309 lentiviruses expressing the ACE2 variants for 48 h. The cells were collected with TrypLE  
310 (Thermo #12605010) and washed twice with cold PBS. Live cells were incubated with the  
311 recombinant proteins RBD-His with mutations (Sino Biological Cat. #40592-V08B;  
312 40592-V08H88, 40592-V08H90, 40592-V08H84, 40592-V08H28, 40592-V08H81, 1 $\mu$ g/ml)  
313 at 4°C for 30 min. After washing, cells were stained with Anti-His-PE (clone:  
314 GG11-8F3.5.1; Miltenyi Biotec; Cat. #130-120-787) for 30 min at 4°C. Cells were then

315 washed twice and subjected to flow cytometry analysis (Thermo, Attune™ NxT). Binding  
316 efficiencies are expressed as the percent of cells positive for RBD-His among the zsGreen  
317 positive cells (ACE2 expressing cells).

318 **Surface plasmon resonance analysis.** The WT or Delta SARS-CoV-2 RBD (residues  
319 Arg319–Phe541) and the N-terminal peptidase domain of human or mouse ACE2  
320 (residues Ser19–Asp615) were expressed using the Bac-to-Bac baculovirus system  
321 (Invitrogen) as described previously<sup>44</sup>. ACE2 was immobilized on a CM5 chip (GE  
322 Healthcare) to a level of around 500 response units using a Biacore T200 (GE Healthcare)  
323 and a running buffer (10 mM HEPES pH 7.2, 150 mM NaCl and 0.05% Tween-20). Serial  
324 dilutions of the SARS-CoV-2 RBD were flowed through with a concentration ranging from  
325 400 to 12.5 nM. The resulting data were fit to a 1:1 binding model using Biacore  
326 Evaluation Software (GE Healthcare).

327 **Production of SARS-CoV-2 pseudotyped virus, determination of viral entry**  
328 **efficiency and analysis of spike protein cleavage.** Pseudoviruses were produced in  
329 HEK293T cells by co-transfecting the retroviral vector pTG-MLV-Fluc, pTG-MLV-Gag-pol,  
330 and pcDNA3.1 expressing SARS-CoV-2 spike gene or VSV-G (pMD2.G (Addgene  
331 #12259)) using VigoFect (Vigorous Biotechnology). At 48 h post transfection, the cell  
332 culture medium was collected for centrifugation at 3500 rpm for 10 min, and then the  
333 supernatant was subsequently aliquoted and stored at -80°C for further use. Virus entry  
334 was assessed by transduction of pseudoviruses in cells expressing ACE2 ortholog or  
335 mutants in 48-well plates. After 48 h, intracellular luciferase activity was determined using  
336 the Luciferase Assay System (Promega, Cat. #E1500) according to the manufacturer's  
337 instructions. Luminescence was recorded on a GloMax® Discover System (Promega). To  
338 analysis of the spike protein cleavage, the concentrated pseudoviruses were produced by  
339 ultracentrifugation at 100,000g for 2 h over a 20% sucrose cushion. Western Blot  
340 detection of SARS-CoV-2 Spike protein was performed using a polyclonal Spike antibody  
341 (Sino Biological Cat. # 40589-V08B1).

342 **Human convalescent serum and neutralization of pseudotyped virion particles.** We

343 obtained convalescent serum from COVID-19 patients (**Table S1, S2 and S3**) more than  
344 one month after documented SARS-CoV-2 infection in the spring of 2020. Each plasma  
345 sample was heat-inactivated (56°C, 30 min) and then assayed for neutralization against  
346 WT or mink-variant pseudoviruses. For neutralization experiments, S protein bearing  
347 pseudotyped virion particles were pre-incubated for 30 min at 37°C with diluted plasma  
348 samples obtained from convalescent COVID-19 patients, before the mixtures were  
349 inoculated onto HeLa-ACE2 cells. Transduction efficiency was determined at 48 h post  
350 inoculation. This study was approved by the Institution Review Board of Tsinghua  
351 University (20210040).

352 **Recombinant ACE2-Ig protein expression and purification.** ACE2-Ig, a recombinant  
353 Fc fusion protein of soluble human ACE2 (residues Gln18-Ser740) was expressed in  
354 293F cells and purified using protein A affinity chromatography as described in our  
355 previous study<sup>28</sup>.

356 **Production of SARS-CoV-2 trVLP.** The desired mutations in the spike proteins of Kappa,  
357 Delta and B.1.618 variants into an SARS-CoV-2 isolate Wuhan-Hu-1 with D614G (WT)  
358 backbone, and the trVLP were generated as previously described<sup>37</sup>.

359 **Statistical analysis.** One-way analysis of variance (ANOVA) with Tukey's honestly  
360 significant difference (HSD) test was used to test for statistical significance of differences  
361 between the different group parameters. *P* values of less than 0.05 were considered  
362 statistically significant.



363 **Figures and Figure legends**

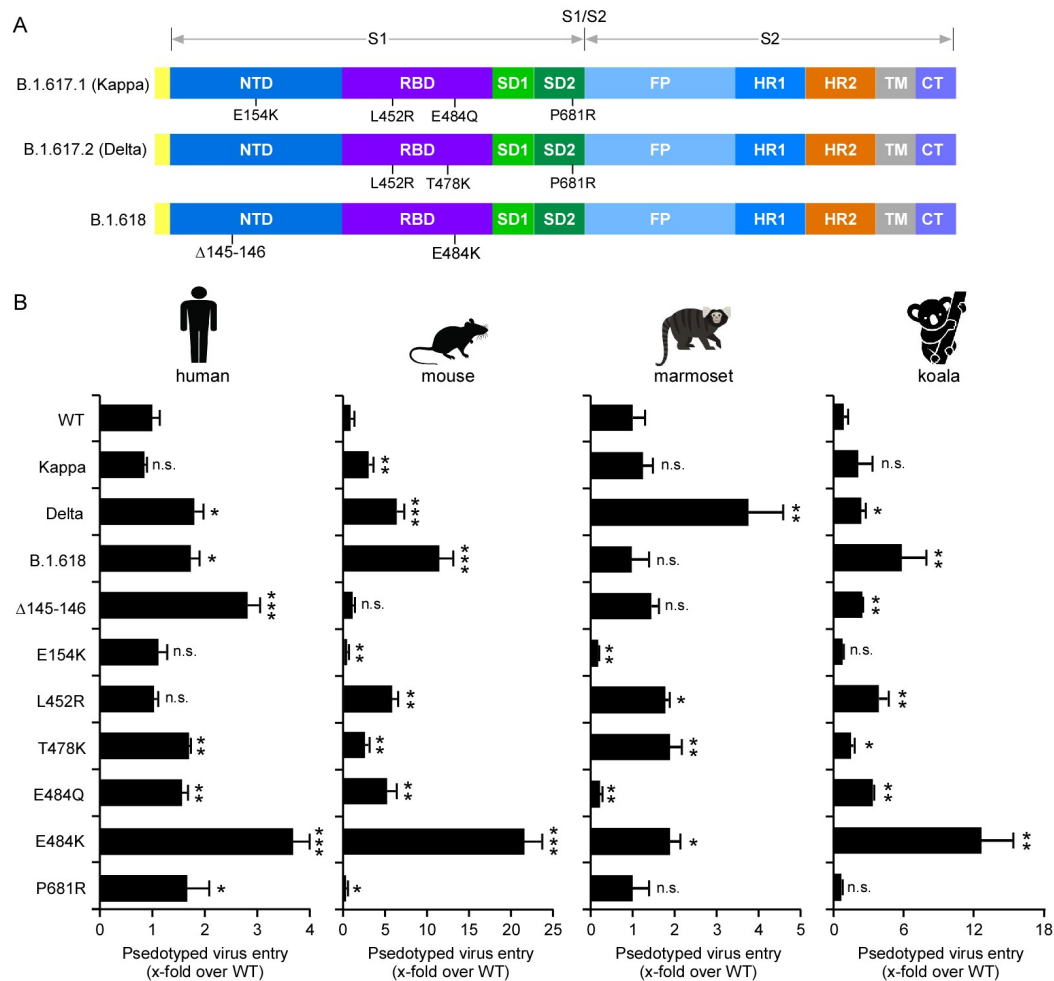

364 **Figure 1. The spike proteins of variants driven viral entry into HeLa cells expressing**  
 365 **human, mouse, marmoset or koala ACE2 orthologs.** (A) Schematic overview of  
 366 SARS-CoV-2 spike proteins of B.1.617.1 (Kappa), B.1.617.2 (Delta) and B.1.618, colored  
 367 by domain. NTD, N-terminal domain; RBD, receptor binding domain; SD1, subdomain 1;  
 368 SD2, subdomain 2; FP, fusion peptide; HR1, heptad repeat 1; HR2, heptad repeat 2; TM,  
 369 transmembrane region; CT, cytoplasmic tail. (B) Cell entry of the virion pseudotyped with  
 370 the WT, Kappa, Delta, B.1.618 spike proteins or individual mutations of these variants  
 371 spike proteins were tested on HeLa cells expressing human, marmoset, or koala ACE2  
 372 orthologs. Luciferase activity was determined after 2 days of infection and data were  
 373 normalized to the WT (D614G) of individual experiment. All infections were performed in  
 374 triplicate, and the data are representative of three independent experiments (mean  $\pm$

375 standard deviation). ns, no significance; \*,  $P < 0.05$ , \*\*,  $P < 0.01$ , \*\*\*,  $P < 0.001$ .

376 Significance assessed by one-way ANOVA.

377

378

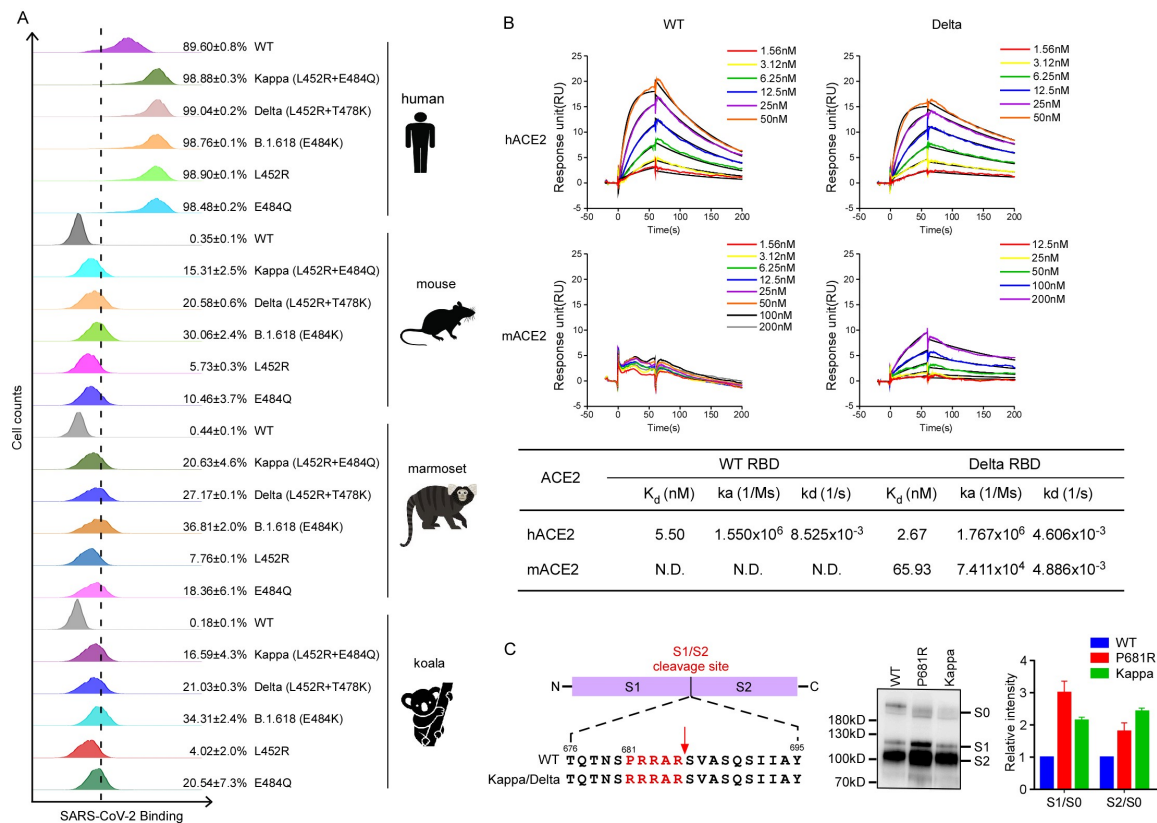

379 **Figure 2. The binding of variants' spike proteins with ACE2 orthologs and the spike**  
 380 **protein processing.** (A) HeLa-ACE2 cells were incubated with recombinant RBD-His  
 381 proteins bearing mutations of Kappa, Delta and B.1.618 or individual mutation. The  
 382 binding of RBD-His with cells were analyzed by flow cytometry. Values are expressed as  
 383 the percent of cells positive for RBD-His among the ACE2-expressing cells (zsGreen1+  
 384 cells) and shown as the means  $\pm$  SD from 3 biological replicates. This experiment was  
 385 independently performed three times with similar results. (B) The binding kinetics of ACE2  
 386 proteins (human or mouse) with recombinant WT or Delta SARS-CoV-2 RBD were  
 387 obtained using the BIAcore. ACE2 proteins were captured on the chip, and serial dilutions  
 388 of RBD were then injected over the chip surface. Experiments were performed three times  
 389 with similar result, and one set of representative data is displayed. (C) Immunoblot  
 390 analysis of spike protein cleavage of pseudovirus of Kappa and P681R using polyclonal  
 391 antibodies against spike. Full-length spike (S0), S1, and S2 protein are indicated. The  
 392 ratio of the S1/S0 or S2/S0 was quantitatively analyzed using ImageJ software. This

393 experiment is repeated twice independently, and data are normalized to the WT (D614G)  
394 of individual experiment.

395

396

397

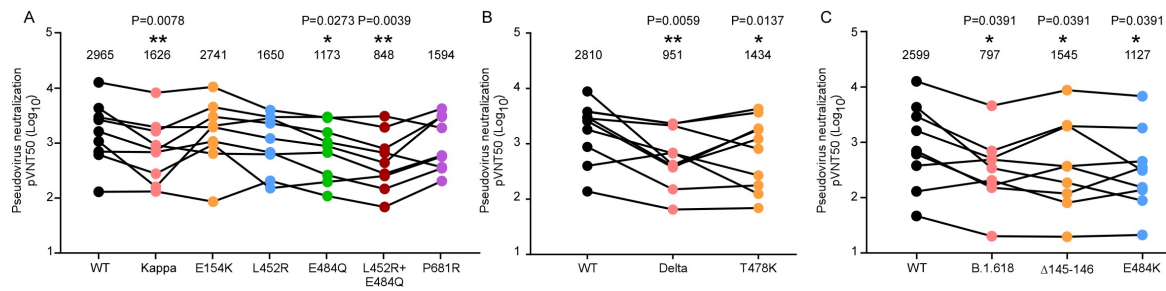

398 **Figure 3. Reduced sensitivity of Kappa, Delta and B.1.618 to neutralization of**  
399 **convalescent sera.** (A-C) MLV particles pseudotyped with the indicated spike proteins of  
400 Kappa, Delta and B.1.618 or mutations as indicated were preincubated with serially  
401 diluted convalescent sera, respectively. HeLa-ACE2 cells were incubated with these  
402 preincubated mixes and analyzed 48 h later by measuring luciferase activity to calculate  
403 the plasma dilution factor leading to 50% reduction in spike protein-driven cell entry  
404 (neutralizing titer 50, NT50). NT50 of each serum against each pseudovirion was  
405 presented and identical serum samples are connected with lines. Statistical significance of  
406 differences between WT and variant spike proteins was analyzed by two sided Friedman  
407 test with Dunn's multiple comparison. \*P < 0.05; \*\*P < 0.01. pVNT50 of each sample is  
408 tested by two repeat.

409

410

411

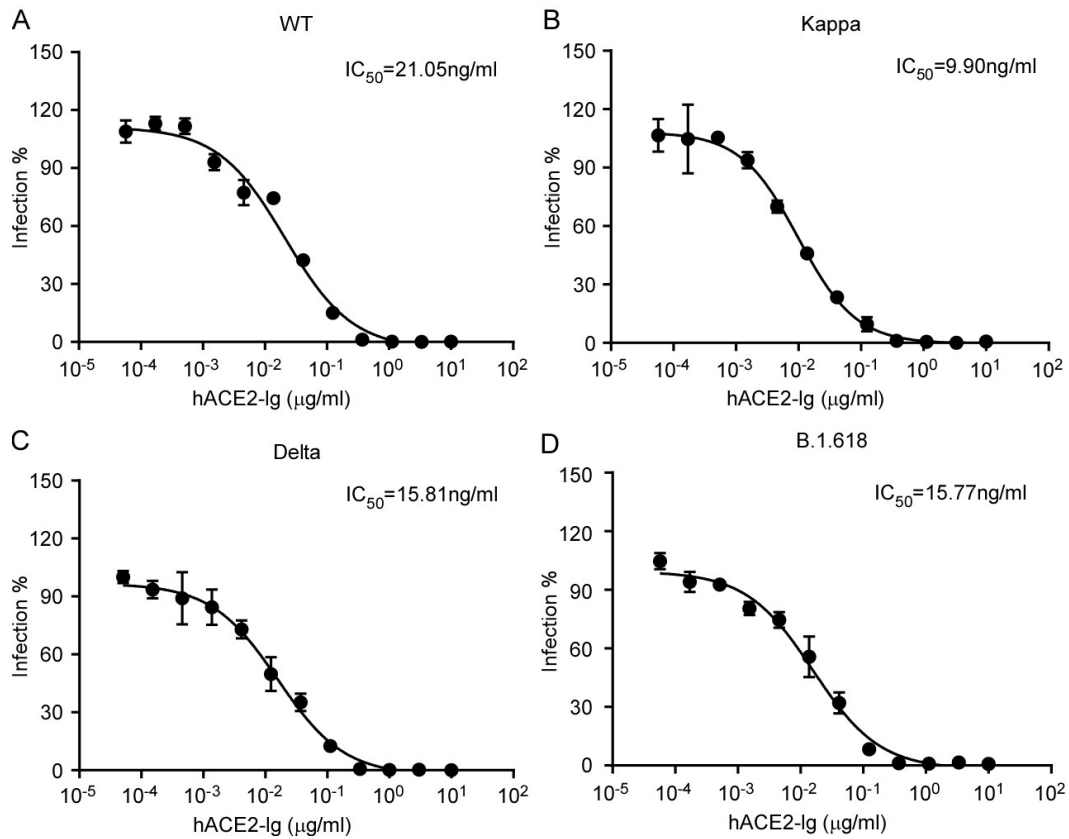

412 **Figure 4. Inhibition of WT, Kappa, Delta and B.1.618 by recombinant ACE2-Ig decoy**  
413 **receptor.** Recombinant ACE2-Ig was diluted at the indicated concentrations. Viral entry  
414 was determined by assessing Luc activity 48 hours post infection of WT (A), Kappa (B),  
415 Delta (C) and B.1.618 (D) trVLP. The dilution factors leading to 50% reduction of  
416 pseudotyped virion entry was calculated as the IC<sub>50</sub> using GraphPad Prism software. Data  
417 shown are representative of three independent experiments with similar results, and data  
418 points represent mean ± SD in triplicate.

419

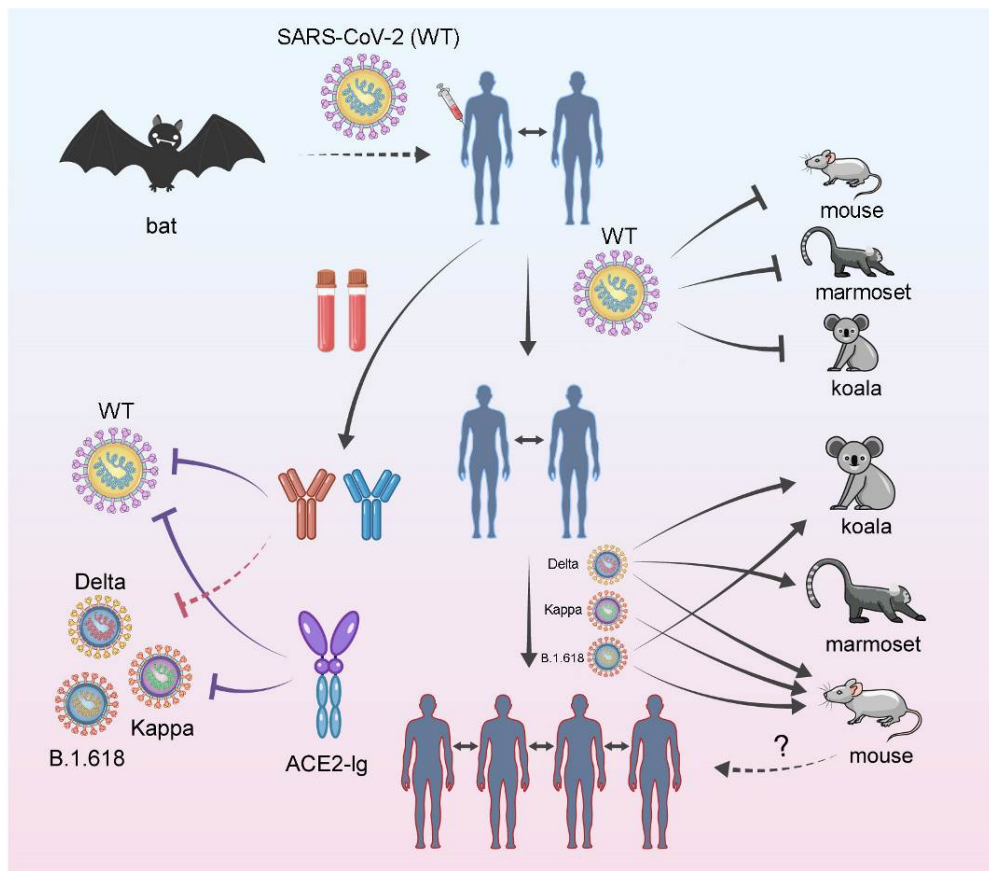

420 **Figure 5. Schematic summary of SARS-CoV-2 variants Kappa, Delta and B.1.618 on**  
421 **cell entry, ACE2 orthologs utilization, and their sensitivities to convalescent plasma**  
422 **and ACE2 decoy receptor.** Bats are considered as the natural zoonotic reservoir for  
423 SARS-CoV-2, which is the causative agent for COVID-19. SARS-CoV-2 uses ACE2 as the  
424 receptor to enter host cells in a species-dependent manner. ACE2 orthologs of mouse,  
425 marmoset or koala cannot bind with SARS-CoV-2 spike protein to mediate virus entry,  
426 therefore, these species are not permissive to SARS-CoV-2 infection. Several viral  
427 variants have been emerged, such as Kappa, Delta and B.1.618 harboring mutations in  
428 the RBD of spike proteins, and these variants have evolved increased binding affinity with  
429 human ACE2, as well as ACE2 orthologs of mouse, marmoset or koala, which potentially  
430 increased transmission in humans, extended their host range, and posed the risk of  
431 zoonotic transmission of virus into humans as mouse have closed contact with humans. In

432 addition, these variants exhibited reduced sensitivities to convalescent plasma from the  
433 recovered patients infected by SARS-CoV-2 (WT), and still sensitive to ACE2-Ig decoy  
434 receptor antiviral measurement.

435

436

437



438

439 **Supplemental Figures and Figure legends**

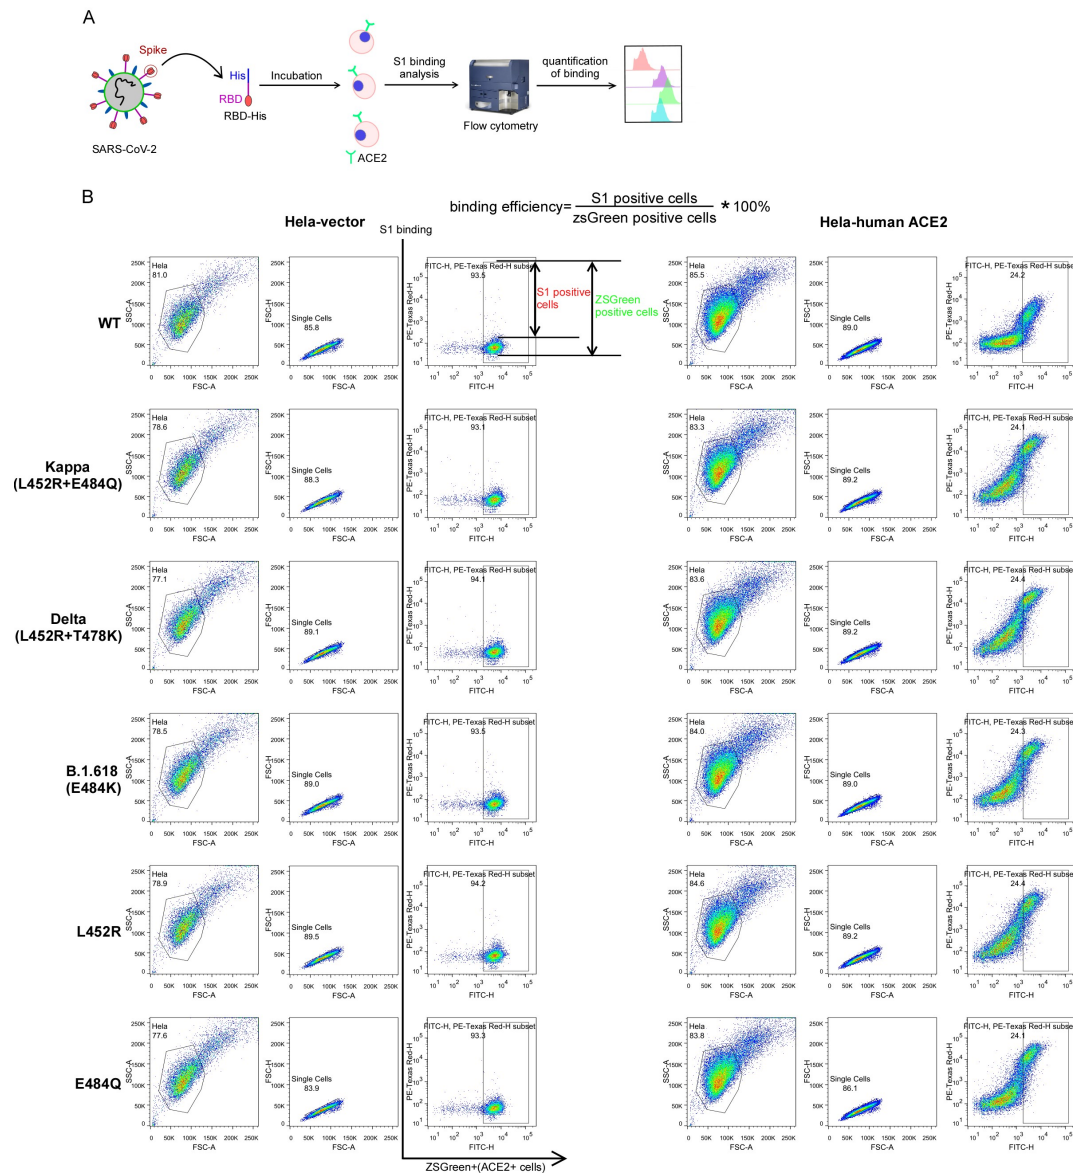

440

441

442

443

444

445

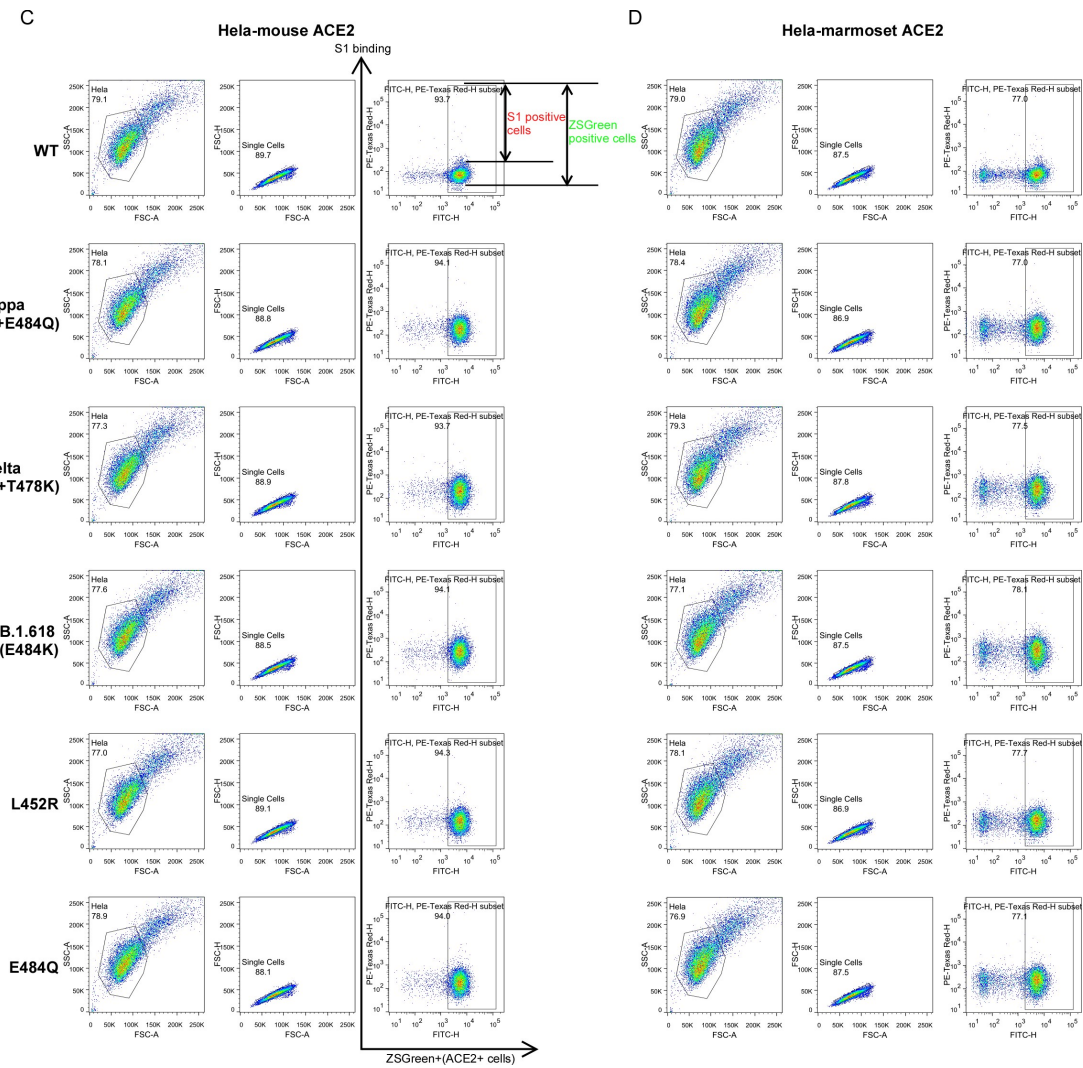

446

447

448

449

450

451

452



458 gated on FSC-A and FSC-H. The gated cells were plotted by FITC-A (zsGreen, as the  
459 ACE2 expressing population) and APC-A (RBD-His bound population). The FITC-A  
460 positive cell population was plotted to show the RBD-His positive population as Fig 2B.  
461 The binding efficiency was defined as the percent of RBD-His binding cells among the  
462 zsGreen positive cells. Shown are FACS plots representative of those that have been  
463 used for the calculations of binding efficiencies of ACE2 variants with RBD-His. This  
464 experiment was independently repeated three times with similar results.  
465

466

467 **Supplemental Tables**

468 **Table S1. Summary of sera information of COVID-19 patients for evaluation of**

469

**Kappa sensitivity**

| Characteristics             | Patients (n=9) |
|-----------------------------|----------------|
| <b>Age (median, range)</b>  | 50 (15-69)     |
| <b>Sex</b>                  |                |
| Male (%)                    | 2 (22.2)       |
| Female (%)                  | 7 (77.8)       |
| <b>Disease severity</b>     |                |
| Severe                      | 4 (44.4)       |
| Non-severe                  | 5 (55.6)       |
| <b>Comorbidities, n (%)</b> |                |
| Fever                       | 5 (55.6)       |
| Fatigue                     | 3 (33.3)       |
| Dry cough                   | 1 (11.1)       |
| Dyspnea                     | 4 (44.4)       |
| Expectoration               | 6 (66.7)       |
| Nausea                      | 2 (22.2)       |
| Dizziness                   | 1 (11.1)       |
| Chills                      | 1 (11.1)       |
| Chest stuffiness            | 4 (44.4)       |

470

471

472

473

474 **Table S2. Summary of sera information of COVID-19 patients for evaluation of**

475

**Delta sensitivity**

| Characteristics             | Patients (n=10) |
|-----------------------------|-----------------|
| <b>Age (median, range)</b>  | 52 (15-69)      |
| <b>Sex</b>                  |                 |
| Male (%)                    | 2 (20.0)        |
| Female (%)                  | 8 (80.0)        |
| <b>Disease severity</b>     |                 |
| Severe                      | 4 (40.0)        |
| Non-severe                  | 6 (60.0)        |
| <b>Comorbidities, n (%)</b> |                 |
| Fever                       | 6 (60.0)        |
| Fatigue                     | 4 (40.0)        |
| Dry cough                   | 1 (10.0)        |
| Dyspnea                     | 4 (40.0)        |
| Expectoration               | 6 (60.0)        |
| Nausea                      | 2 (20.0)        |
| Dizziness                   | 2 (20.0)        |
| Chills                      | 1 (10.0)        |
| Chest stuffiness            | 5 (50.0)        |

476

477

478

479

480

481 **Table S3. Summary of sera information of COVID-19 patients for evaluation of**

482

**B.1.618 sensitivity**

| Characteristics             | Patients (n=9) |
|-----------------------------|----------------|
| <b>Age (median, range)</b>  | 49 (15-69)     |
| <b>Sex</b>                  |                |
| Male (%)                    | 2 (22.2)       |
| Female (%)                  | 7 (77.8)       |
| <b>Disease severity</b>     |                |
| Severe                      | 2 (22.2)       |
| Non-severe                  | 7 (77.8)       |
| <b>Comorbidities, n (%)</b> |                |
| Fever                       | 5 (55.6)       |
| Fatigue                     | 3 (33.3)       |
| Dry cough                   | 1 (11.1)       |
| Dyspnea                     | 2 (22.2)       |
| Expectoration               | 4 (44.4)       |
| Nausea                      | 1 (11.1)       |
| Dizziness                   | 2 (22.2)       |
| Chills                      | 1 (11.1)       |
| Chest stuffiness            | 4 (44.4)       |

483

484

485

486 **References**

- 487 1 Wu, A. *et al.* One year of SARS-CoV-2 evolution. *Cell Host Microbe* **29**, 503-507,  
488 doi:10.1016/j.chom.2021.02.017 (2021).
- 489 2 Zhou, P. *et al.* A pneumonia outbreak associated with a new coronavirus of probable bat  
490 origin. *Nature* **579**, 270-273, doi:10.1038/s41586-020-2012-7 (2020).
- 491 3 Wu, F. *et al.* A new coronavirus associated with human respiratory disease in China.  
492 *Nature* **579**, 265-269, doi:10.1038/s41586-020-2008-3 (2020).
- 493 4 Wang, C., Horby, P. W., Hayden, F. G. & Gao, G. F. A novel coronavirus outbreak of global  
494 health concern. *Lancet* **395**, 470-473, doi:10.1016/S0140-6736(20)30185-9 (2020).
- 495 5 Hoffmann, M. *et al.* SARS-CoV-2 Cell Entry Depends on ACE2 and TMPRSS2 and Is  
496 Blocked by a Clinically Proven Protease Inhibitor. *Cell* **181**, 271-280 e278,  
497 doi:10.1016/j.cell.2020.02.052 (2020).
- 498 6 Lu, G., Wang, Q. & Gao, G. F. Bat-to-human: spike features determining 'host jump' of  
499 coronaviruses SARS-CoV, MERS-CoV, and beyond. *Trends Microbiol* **23**, 468-478,  
500 doi:10.1016/j.tim.2015.06.003 (2015).
- 501 7 Liu, Y. *et al.* Functional and genetic analysis of viral receptor ACE2 orthologs reveals a  
502 broad potential host range of SARS-CoV-2. *Proc Natl Acad Sci U S A* **118**,  
503 doi:10.1073/pnas.2025373118 (2021).
- 504 8 Ju, B. *et al.* Human neutralizing antibodies elicited by SARS-CoV-2 infection. *Nature* **584**,  
505 115-119, doi:10.1038/s41586-020-2380-z (2020).
- 506 9 Krammer, F. SARS-CoV-2 vaccines in development. *Nature* **586**, 516-527,  
507 doi:10.1038/s41586-020-2798-3 (2020).
- 508 10 Jiang, R. D. *et al.* Pathogenesis of SARS-CoV-2 in Transgenic Mice Expressing Human  
509 Angiotensin-Converting Enzyme 2. *Cell* **182**, 50-58 e58, doi:10.1016/j.cell.2020.05.027  
510 (2020).
- 511 11 Leist, S. R. *et al.* A Mouse-adapted SARS-CoV-2 induces Acute Lung Injury (ALI) and  
512 mortality in Standard Laboratory Mice. *Cell*, doi:10.1016/j.cell.2020.09.050 (2020).
- 513 12 Gu, H. *et al.* Adaptation of SARS-CoV-2 in BALB/c mice for testing vaccine efficacy.  
514 *Science* **369**, 1603-1607, doi:10.1126/science.abc4730 (2020).
- 515 13 Korber, B. *et al.* Tracking Changes in SARS-CoV-2 Spike: Evidence that D614G Increases  
516 Infectivity of the COVID-19 Virus. *Cell* **182**, 812-827 e819, doi:10.1016/j.cell.2020.06.043  
517 (2020).
- 518 14 Plante, J. A. *et al.* Spike mutation D614G alters SARS-CoV-2 fitness. *Nature* **592**, 116-121,  
519 doi:10.1038/s41586-020-2895-3 (2021).
- 520 15 Peacock, T. P., Penrice-Randal, R., Hiscox, J. A. & Barclay, W. S. SARS-CoV-2 one year on:  
521 evidence for ongoing viral adaptation. *J Gen Virol* **102**, doi:10.1099/jgv.0.001584 (2021).
- 522 16 Starr, T. N. *et al.* Deep Mutational Scanning of SARS-CoV-2 Receptor Binding Domain  
523 Reveals Constraints on Folding and ACE2 Binding. *Cell* **182**, 1295-1310 e1220,  
524 doi:10.1016/j.cell.2020.08.012 (2020).
- 525 17 Zhou, D. *et al.* Evidence of escape of SARS-CoV-2 variant B.1.351 from natural and  
526 vaccine-induced sera. *Cell* **184**, 2348-2361 e2346, doi:10.1016/j.cell.2021.02.037 (2021).
- 527 18 Garcia-Beltran, W. F. *et al.* Multiple SARS-CoV-2 variants escape neutralization by



- 528 vaccine-induced humoral immunity. *Cell*, doi:10.1016/j.cell.2021.03.013 (2021).
- 529 19 Harvey, W. T. *et al.* SARS-CoV-2 variants, spike mutations and immune escape. *Nat Rev*  
530 *Microbiol*, doi:10.1038/s41579-021-00573-0 (2021).
- 531 20 Cherian, S. *et al.* Convergent evolution of SARS-CoV-2 spike mutations, L452R, E484Q  
532 and P681R, in the second wave of COVID-19 in Maharashtra, India. *bioRxiv*,  
533 2021.2004.2022.440932, doi:10.1101/2021.04.22.440932 (2021).
- 534 21 Tada, T. *et al.* The Spike Proteins of SARS-CoV-2 B.1.617 and B.1.618 Variants Identified  
535 in India Provide Partial Resistance to Vaccine-elicited and Therapeutic Monoclonal  
536 Antibodies. *bioRxiv* (2021).
- 537 22 McCallum, M. *et al.* SARS-CoV-2 immune evasion by variant B.1.427/B.1.429. *bioRxiv*,  
538 doi:10.1101/2021.03.31.437925 (2021).
- 539 23 Motozono, C. *et al.* SARS-CoV-2 spike L452R variant evades cellular immunity and  
540 increases infectivity. *Cell Host Microbe* **29**, 1124-1136 e1111,  
541 doi:10.1016/j.chom.2021.06.006 (2021).
- 542 24 Di Giacomo, S., Mercatelli, D., Rakhimov, A. & Giorgi, F. M. Preliminary report on severe  
543 acute respiratory syndrome coronavirus 2 (SARS-CoV-2) Spike mutation T478K. *J Med*  
544 *Viro* **93**, 5638-5643, doi:10.1002/jmv.27062 (2021).
- 545 25 Planas, D. *et al.* Sensitivity of infectious SARS-CoV-2 B.1.1.7 and B.1.351 variants to  
546 neutralizing antibodies. *Nat Med* **27**, 917-924, doi:10.1038/s41591-021-01318-5 (2021).
- 547 26 Cele, S. *et al.* Escape of SARS-CoV-2 501Y.V2 from neutralization by convalescent  
548 plasma. *Nature*, doi:10.1038/s41586-021-03471-w (2021).
- 549 27 Edara, V. V. *et al.* Infection- and vaccine-induced antibody binding and neutralization of  
550 the B.1.351 SARS-CoV-2 variant. *Cell Host Microbe* **29**, 516-521 e513,  
551 doi:10.1016/j.chom.2021.03.009 (2021).
- 552 28 Li, Y. *et al.* SARS-CoV-2 and Three Related Coronaviruses Utilize Multiple ACE2  
553 Orthologs and Are Potently Blocked by an Improved ACE2-Ig. *J Virol* **94**,  
554 doi:10.1128/JVI.01283-20 (2020).
- 555 29 Ren, W. *et al.* Comparative analysis reveals the species-specific genetic determinants of  
556 ACE2 required for SARS-CoV-2 entry. *PLoS Pathog* **17**, e1009392,  
557 doi:10.1371/journal.ppat.1009392 (2021).
- 558 30 Papa, G. *et al.* Furin cleavage of SARS-CoV-2 Spike promotes but is not essential for  
559 infection and cell-cell fusion. *PLoS Pathog* **17**, e1009246,  
560 doi:10.1371/journal.ppat.1009246 (2021).
- 561 31 Walls, A. C. *et al.* Structure, Function, and Antigenicity of the SARS-CoV-2 Spike  
562 Glycoprotein. *Cell* **181**, 281-292 e286, doi:10.1016/j.cell.2020.02.058 (2020).
- 563 32 Zhu, Y. *et al.* A genome-wide CRISPR screen identifies host factors that regulate  
564 SARS-CoV-2 entry. *Nat Commun* **12**, 961, doi:10.1038/s41467-021-21213-4 (2021).
- 565 33 Matsuyama, S. *et al.* Enhanced isolation of SARS-CoV-2 by TMPRSS2-expressing cells.  
566 *Proc Natl Acad Sci U S A* **117**, 7001-7003, doi:10.1073/pnas.2002589117 (2020).
- 567 34 Cao, Y. *et al.* Potent Neutralizing Antibodies against SARS-CoV-2 Identified by  
568 High-Throughput Single-Cell Sequencing of Convalescent Patients' B Cells. *Cell* **182**,  
569 73-84 e16, doi:10.1016/j.cell.2020.05.025 (2020).
- 570 35 Hassan, A. O. *et al.* A SARS-CoV-2 Infection Model in Mice Demonstrates Protection by

- 571 Neutralizing Antibodies. *Cell* **182**, 744-753 e744, doi:10.1016/j.cell.2020.06.011 (2020).  
572 36 Monteil, V. *et al.* Inhibition of SARS-CoV-2 Infections in Engineered Human Tissues Using  
573 Clinical-Grade Soluble Human ACE2. *Cell* **181**, 905-913.e907,  
574 doi:10.1016/j.cell.2020.04.004 (2020).  
575 37 Ju, X. *et al.* A novel cell culture system modeling the SARS-CoV-2 life cycle. *PLoS Pathog*  
576 **17**, e1009439, doi:10.1371/journal.ppat.1009439 (2021).  
577 38 Rochman, N. D. *et al.* Ongoing global and regional adaptive evolution of SARS-CoV-2.  
578 *Proceedings of the National Academy of Sciences* **118**, doi:10.1073/pnas.2104241118  
579 (2021).  
580 39 Zhou, H. Y. *et al.* Convergent evolution of SARS-CoV-2 in human and animals. *Protein*  
581 *Cell*, doi:10.1007/s13238-021-00847-6 (2021).  
582 40 Planas, D. *et al.* Reduced sensitivity of SARS-CoV-2 variant Delta to antibody  
583 neutralization. *Nature*, doi:10.1038/s41586-021-03777-9 (2021).  
584 41 Johnson, B. A. *et al.* Loss of furin cleavage site attenuates SARS-CoV-2 pathogenesis.  
585 *Nature* **591**, 293-299, doi:10.1038/s41586-021-03237-4 (2021).  
586 42 Li, F., Li, W., Farzan, M. & Harrison, S. C. Structure of SARS coronavirus spike  
587 receptor-binding domain complexed with receptor. *Science* **309**, 1864-1868,  
588 doi:10.1126/science.1116480 (2005).  
589 43 Kuba, K. *et al.* A crucial role of angiotensin converting enzyme 2 (ACE2) in SARS  
590 coronavirus-induced lung injury. *Nat Med* **11**, 875-879, doi:10.1038/nm1267 (2005).  
591 44 Lan, J. *et al.* Structure of the SARS-CoV-2 spike receptor-binding domain bound to the  
592 ACE2 receptor. *Nature* **581**, 215-220, doi:10.1038/s41586-020-2180-5 (2020).  
593
